# Supplementary material for: Orthogonal solvent-sequential deposition of a nonfullerene acceptor solution on polymer donor film: complete interpenetration and highly efficient inverted organic solar cells
Source: Royal Society of Chemistry journal article supplement (doi:10.1039/d3ta04269c), 2023-01-01
Supplement: d3ta04269c1.pdf [file d3ta04269c1.pdf]

## Electronic supplementary information

### **Orthogonal solvent-sequential deposition of nonfullerene acceptor solution on polymer donor film: complete interpenetration and highly efficient inverted organic solar cells†**

Haizhen Liu,‡ Zesheng Zhang,‡ Dong Yuan,‡ Mingqing Chen, Haiying Jiang, Jiahao Liang, Xing Chen, Di Sun, Lianjie Zhang, Linlin Liu, Yuguang Ma and Junwu Chen\*

*Institute of Polymer Optoelectronic Materials & Devices, State Key Laboratory of Luminescent Materials & Devices, South China University of Technology, Guangzhou 510640, P. R. China. E-mail: psjwchen@scut.edu.cn*

† Electronic supplementary information (ESI) available. See DOI:10.1039/xxxxx

‡ These authors contributed equally to this article.

## **Experimental Section**

### ***Materials***

PFN-Br was purchased from Solarmer Materials (Beijing) Inc. Polymer donors Si25, PQSi705 and D18-C16 were synthesized according to previous reports.<sup>1-3</sup> Non-fullerene acceptors Y6-HD and Y6-BO were purchased from Shenzhen Yirou Photovoltaic Technology Co., Ltd. The processing solvents used in the device fabrication were purchased from Sigma Aldrich and used as received.

### ***Device fabrication***

The devices with a 0.057 cm<sup>2</sup> active area were fabricated in both conventional and

inverted structures. A conventional device structure of indium tin oxide (ITO)/poly (3,4-ethylenedioxythiophene) polystyrene sulfonate (PEDOT:PSS)/active layer/PFN-Br/Al and an inverted one of ITO/ZnO/active layer/MoO<sub>3</sub>/Al were utilized in this work. The patterned ITO-coated glass substrates with a sheet resistance of 15-20 ohm square<sup>-1</sup> were cleaned by sequential sonication using detergent, acetone, deionized water, and ethanol, and dried in oven at 70 °C before used.

For the conventional devices, PEDOT:PSS (Baytron P VP AI 4083 from H. C. Stark) was spin-coated on top of pre-cleaned and UVO-treated ITO substrate at 3000 rpm for 30 s, and then dried at 150 °C for 15 min in air. Subsequently, the ITO substrates were transferred to a nitrogen-filled glovebox and then the donor and acceptor solutions were spin-coated on the substrates. For sequentially deposited Si25/Y6-HD active layer, the Si25 was dissolved in chlorobenzene with 6 mg/mL at 80 °C and then spin-coated with the hot solution, leading to a Si25 layer with a thickness of about 50 nm. A 8 mg/mL Y6-HD solution dissolved in chloroform was spin-coated on the Si25 layer at 1500 rpm, and the thickness of the Y6-HD layer was about 55nm. For Si25:Y6-HD BHJ active layer, Si25:Y6-HD blend solution were prepared by dissolving in 80 °C chlorobenzene at a donor concentration of 6 mg/mL with a donor:acceptor mass ratio of 1:1.2. The spin-coating film of BHJ active layer was conducted at 1500 rpm for 60 s, giving a film thickness of ~105 nm. For the D18-C16/Y6-BO SD active layer, the D18-C16 was dissolved in indane with 6 mg/mL at 60 °C and was spin-coated at 1600 rpm to form a film of about 50 nm. A 8 mg/mL Y6-BO solution dissolved in tetrahydrofuran was spin-coated on the D18-C16 layer at 1500 rpm. The thickness of

the Y6-BO layer was about 55 nm. Then the active layer was annealed at 100 °C for 10 min. For the PQSi705/Y6-BO SD active layer, the PQSi705 was dissolved in *o*-xylene with 10 mg/mL at 60 °C. The PQSi705 solution was spin-coated on the substrate at 1800 rpm to form a film of about 50 nm. A 8 mg/mL Y6-BO solution dissolved in tetrahydrofuran was spin-coated on the PQSi705 layer at 1500 rpm. The thickness of the Y6-BO layer was about 55 nm. Subsequently, the PQSi705/Y6-BO SD active layer was annealed at 110 °C for 5 min. Afterward, around 5 nm thick PFN-Br layer (0.5 mg/mL in methanol, 2000 rpm) was spin-coated onto the active layer. Finally, 100 nm aluminum (Al) was thermally deposited through a shadow mask in a vacuum chamber at a pressure of  $2 \times 10^{-4}$  Pa.

For the inverted devices, a ZnO layer of 30 nm was spin-coated onto the ITO substrate and annealed at 200 °C on a hot plate for 30 min. After that, the ITO substrates were transferred to a nitrogen-filled glove-box and the active layer was spin-coated on the substrates. The preparation methods of the Si25/Y6-HD SD active layer, Si25:Y6-HD BHJ active layer, D18-C16/Y6-BO SD active layer, and PQSi705/Y6-BO SD active layer are same as those for the conventional devices. Finally, 5 nm MoO<sub>3</sub> and then 100 nm Al were thermally deposited on top of the active layer through a shadow mask in a vacuum chamber at a pressure of  $2 \times 10^{-4}$  Pa.

### ***Instruments and characterization***

UV-vis absorption spectra were carried out via UV-3600 (Shimadzu Co.) spectrophotometer.

The thickness values of the PEDOT:PSS, ZnO, PFN-Br, and active layer were

verified by a surface profilometer (Tencor, Alpha-500), and the thickness values of the evaporated MoO<sub>3</sub> and Al cathodes were monitored by a quartz crystal thickness/ratio monitor (Model: STM-100/MF, Sycon).

The Gel permeation chromatography (GPC): The molecular weights of Si25, PQSi705 and D18-C16 were determined using a PL-GPC 220 high-temperature chromatography in 1,2,4-trichlorobenzene (TCB) at 150 °C and using a calibration curve of polystyrene standards.

The photovoltaic performance was measured under an AM 1.5G (air mass 1.5 global) spectrum from a solar simulator (Japan, SAN-EI, XES-40S1). The light intensity of the solar simulator was calibrated with standard silicon solar cell at 100 mW/cm<sup>2</sup> before the testing, the silicon solar cell was calibrated by a National Renewable Energy Laboratory (NREL) certified silicon photodiode. The current density-voltage (*J-V*) curves were recorded with a Keithley 2400 source meter.

The external quantum efficiency (EQE) data were gained through the solar-cell spectral-response measurement system (QE-R3011, Enlitech), which was calibrated with a crystal silicon photovoltaic cell before testing.

The hole mobilities ( $\mu_h$ ) and electron mobilities ( $\mu_e$ ) of active layers were measured by the space charge limited current (SCLC) method<sup>4</sup> with hole-only devices of ITO/PEDOT:PSS/Active layer/MoO<sub>3</sub>/Al and electron-only devices of ITO/ZnO/Active layer/PFN-Br/Al. The  $\mu_h$  and  $\mu_e$  were determined by fitting the dark current to the model of a single carrier SCLC, described by the equation:

$$J = \frac{9}{8} \varepsilon_0 \varepsilon_r \mu \frac{V^2}{d^3}$$

where  $J$  is the current,  $\epsilon_0$  is the permittivity of free space,  $\epsilon_r$  is the material relative permittivity,  $V$  is the effective voltage and  $d$  is the thickness of the active layer. The effective voltage can be obtained by subtracting the built-in voltage ( $V_{bi}$ ) from the applied voltage ( $V_{appl}$ ),  $V = V_{appl} - V_{bi}$ . The mobility can be calculated from the slope of the  $J^{1/2} - V$  curves.

The surface morphologies of AFM images relative to the corresponding SD and BHJ active layers were obtained on a Multimode 8 Dimension Icon Scanning Probe Microscope (Bruker, Multimode 8) in the tapping mode.

TEM micrographs of the SD and BHJ active layers were obtained on a JEM 1400 Plus microscope operating at 300kV.

Time-of-Flight Secondary Ion Mass Spectrometry (TOF-SIMS) Measurements. The depth-profile data were obtained with TOF-SIMS (ION-TOF GmbH, Germany) instrument in negative mode (sputter condition: a 5 kV GCIB beam; 45deg; Area: 400  $\mu\text{m} \times 400 \mu\text{m}$ ; analysis condition: a 30 keV Bi<sup>3+</sup> beam; 45deg; Area: 150  $\mu\text{m} \times 150 \mu\text{m}$ ; Pixel 128\*128).

## Supplementary Figures and Tables

**Table S1** Photovoltaic device parameters and processing conditions of active layer prepared for inverted SD OSCs

| Donor       | Solvent (D)  | Acceptor              | Solvent (A)      | $V_{oc}$ [V] | $J_{sc}$ [mA cm <sup>-2</sup> ] | FF [%] | PCE [%]      | Ref.             |
|-------------|--------------|-----------------------|------------------|--------------|---------------------------------|--------|--------------|------------------|
| PCPDTFBT    | <i>o</i> -XY | PC <sub>71</sub> BM   | <i>o</i> -XY:DCB | 0.71         | 16.4                            | 50     | 5.84         | 5                |
| PffBT4T-2OD | CB:DCB       | PC <sub>71</sub> BM   | CB:DCB           | 0.76         | 16.5                            | 75     | 9.4          | 6                |
| PBDB-T      | CB           | IT-IC                 | <i>o</i> -XY     | 0.86         | 15.30                           | 50.50  | 6.70         | 7                |
| J60         | CB           | TBDPDI-C <sub>5</sub> | CB               | 0.969        | 10.57                           | 59.62  | 6.11         | 8                |
| Si25        | CB           | Y6-HD                 | CF               | 0.70         | 24.85                           | 67.52  | 11.74        | <b>This work</b> |
| PQSi705     | <i>o</i> -XY | Y6-BO                 | THF              | 0.84         | 25.49                           | 72.61  | 15.57        | <b>This work</b> |
| D18-C16     | Indane       | Y6-BO                 | THF              | 0.89         | 26.99                           | 67.57  | <b>16.23</b> | <b>This work</b> |

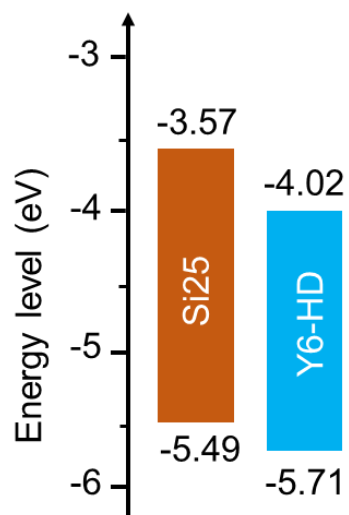

**Fig. S1** The energy levels of polymer Si25 and acceptor Y6-HD. The energy levels of the Si25 were obtained from cyclic voltammetry results, which carried out on a CHI660A electrochemical workstation.<sup>9</sup> The energy levels of the Y6-HD were based on literature.<sup>10</sup>

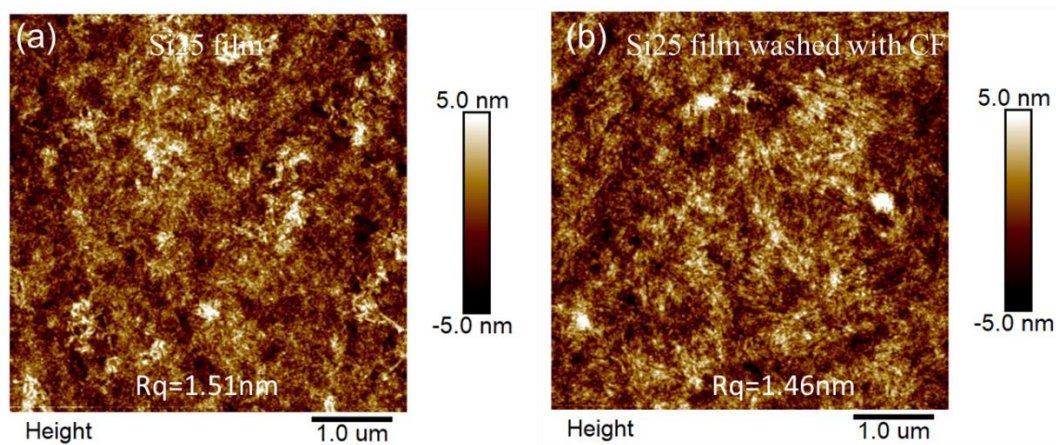

**Fig. S2** AFM images of the (a) Si25 film and (b) its film washed with chloroform.

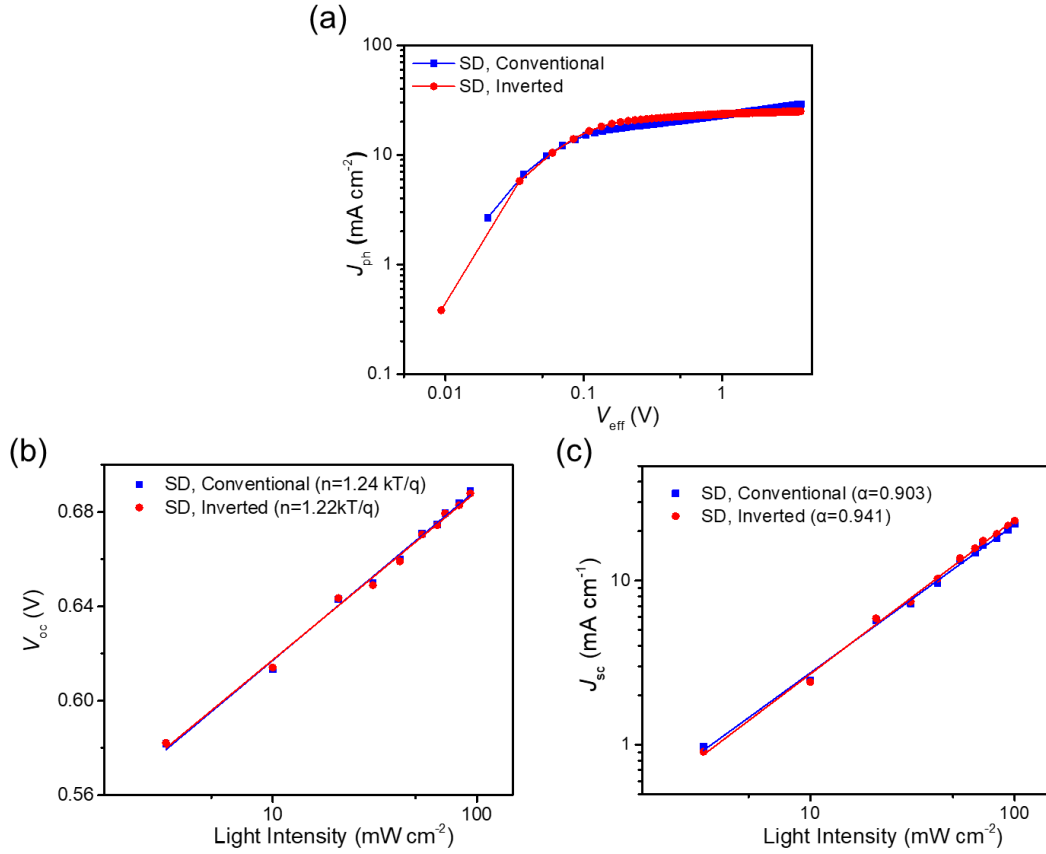

**Fig. S3** (a)  $J_{ph}$ - $V_{eff}$  curves and (b) the dependency of  $V_{oc}$  on light intensity and (c)  $J_{sc}$  on light intensity of the OSCs based on Si25/Y6-HD SD active layer.

**Table S2**  $J_{ph}$ ,  $J_{sat}$ , dissociation efficiency ( $\eta_{diss}$ ) and charge collection efficiency ( $\eta_{coll}$ ) of the devices based on Si25/Y6-HD SD active layer

| Device structure | $J_{ph}^a$ [mA/cm <sup>2</sup> ] | $J_{ph}^b$ [mA/cm <sup>2</sup> ] | $J_{sat}$ [mA/cm <sup>2</sup> ] | $\eta_{diss}$ [%] | $\eta_{coll}$ [%] |
|------------------|----------------------------------|----------------------------------|---------------------------------|-------------------|-------------------|
| Conventional     | 22.58                            | 18.15                            | 23.27                           | 97.03             | 77.99             |
| Inverted         | 23.77                            | 19.82                            | 24.50                           | 97.02             | 80.89             |

<sup>a</sup> $J_{ph}$  under short-circuit condition. <sup>b</sup> $J_{ph}$  under maximal power output condition.



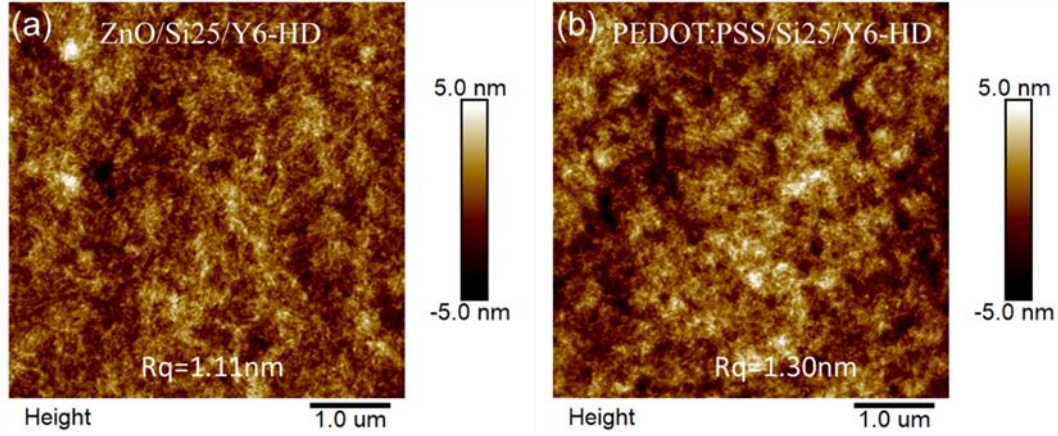

**Fig. S4** AFM images of the Si25/Y6-HD SD active layer spin coating on (a) ZnO and (b) PEDOT:PSS substrate.

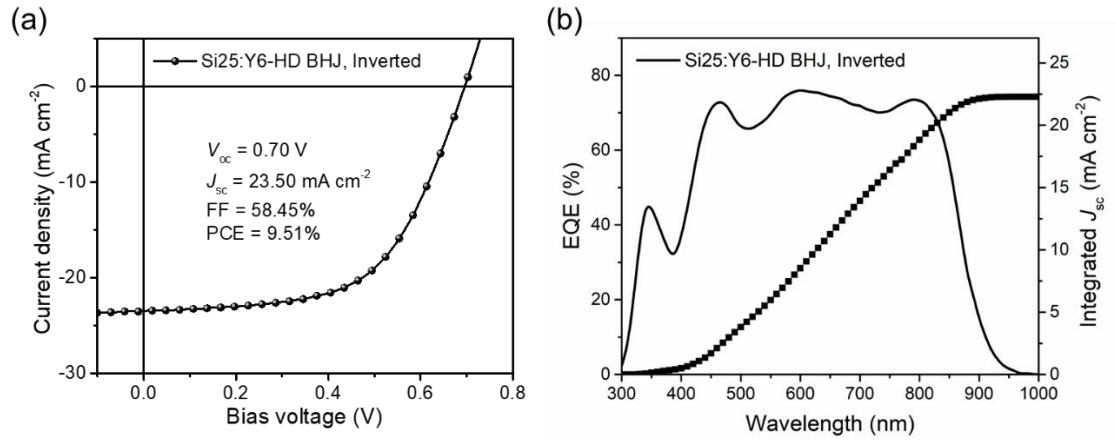

**Fig. S5** (a) The current density-voltage ( $J$ - $V$ ) curve and (b) EQE curves of Si25:Y6-HD based BHJ active layer inverted devices.

**Table S3.** Performance parameters of the inverted BHJ OSCs based on the Si25:Y6-HD active layers

| Device structure | $V_{OC}$ [V]         | $J_{SC}$ [ $\text{mA cm}^{-2}$ ] | $J_{sc,EQE}$ [ $\text{mA cm}^{-2}$ ] | FF [%]               | PCE <sup>a</sup> [%] |
|------------------|----------------------|----------------------------------|--------------------------------------|----------------------|----------------------|
| Inverted         | 0.70                 | 23.50                            | 22.32                                | 58.45                | 9.51                 |
|                  | ( $0.70 \pm 0.004$ ) | ( $22.99 \pm 0.70$ )             |                                      | ( $57.13 \pm 0.97$ ) | ( $9.18 \pm 0.28$ )  |

<sup>a</sup> Statistical data in parentheses are average values with standard deviation from 10 independent devices.

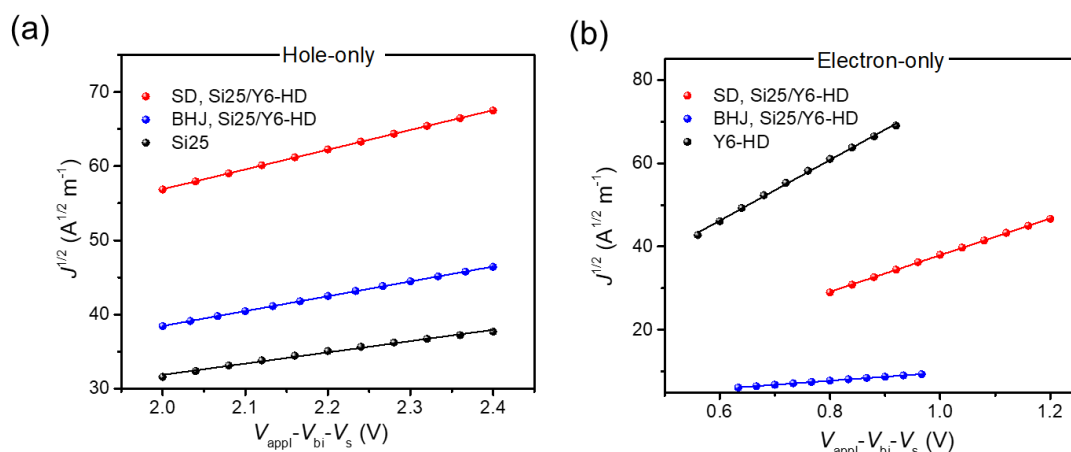

**Fig. S6**  $J^{1/2}$ - $V$  curves of the (a) hole-only based on Si25 neat film as well as Si25/Y6-HD SD and Si25:Y6-HD BHJ active layer, and (b) electron devices based on Y6-HD neat film as well as Si25/Y6-HD SD and Si25:Y6-HD BHJ active layer.

**Table S4.** The hole mobilities ( $\mu_h$ ) and electron mobilities ( $\mu_e$ ) values of Si25, Y6-HD neat film as well as the Si25/Y6-HD SD and Si25:Y6-HD BHJ active layer.

| Device          | hole mobility ( $\mu_h$ ) | electron mobility ( $\mu_e$ ) | $\mu_e / \mu_h$ |
|-----------------|---------------------------|-------------------------------|-----------------|
| Si25            | $2.60 \times 10^{-4}$     | /                             | /               |
| Y6-HD           | /                         | $7.49 \times 10^{-4}$         | /               |
| SD, Si25/Y6-HD  | $5.23 \times 10^{-4}$     | $1.43 \times 10^{-3}$         | 2.73            |
| BHJ, Si25:Y6-HD | $4.54 \times 10^{-4}$     | $1.05 \times 10^{-4}$         | 4.32            |

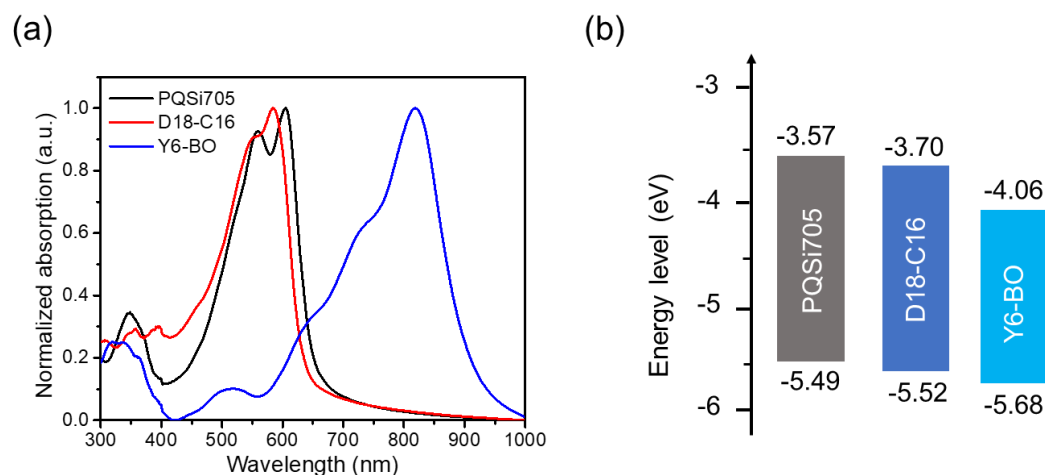

**Fig. S7** (a) The film absorption spectra and (b) energy levels of PQSi705, D18-C16 and Y6-BO. The energy levels of the PQSi705 and D18-C16 were obtained from cyclic voltammetry results, which carried out on a CHI660A electrochemical workstation.<sup>9</sup> The energy levels of the Y6-HD were based on literature.<sup>11</sup>

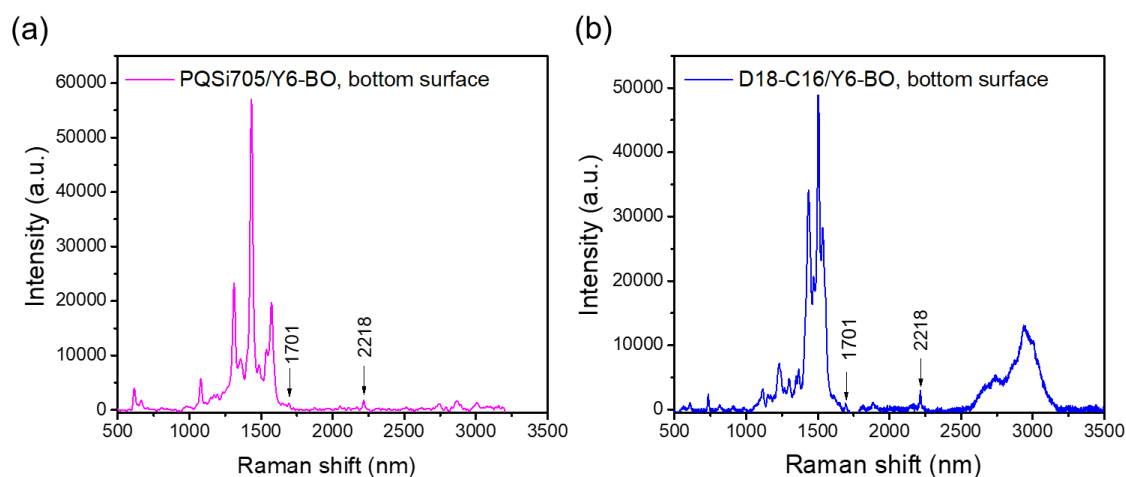

**Fig. S8** Raman spectra of the bottom surface of PQSi705/Y6-BO and D18-C16/Y6-BO SD film.

## References

1. X. Liu, L. Nian, K. Gao, L. Zhang, L. Qing, Z. Wang, L. Ying, Z. Xie, Y. Ma, Y. Cao, F. Liu and J. Chen, *J. Mater. Chem. A*, 2017, **5**, 17619-17631.
2. D. Yuan, L. Zhang and J. Chen, *ChemSusChem*, 2022, **15**, e202200789.
3. Q. Liu, Y. Jiang, K. Jin, J. Qin, J. Xu, W. Li, J. Xiong, J. Liu, Z. Xiao, K. Sun, S. Yang, X. Zhang and L. Ding, *Sci. Bull.*, 2020, **65**, 272-275.
4. M. A. Lampert and P. Mark, *Electrical Science*, 1970, **21**, 558.
5. C. Lang, J. Fan, Y. Zhang, F. Guo and L. Zhao, *Org. Electron.*, 2016, **36**, 82-88.
6. S. Dong, K. Zhang, B. Xie, J. Xiao, H.-L. Yip, H. Yan, F. Huang and Y. Cao, *Adv. Energy Mater.*, 2019, **9**, 1802832.
7. L. Huang, P. Jiang, Y. Zhang, L. Zhang, Z. Yu, Q. He, W. Zhou, L. Tan and Y. Chen, *ACS Appl. Mater. Interfaces*, 2019, **11**, 26213-26221.
8. M. Hu, Y. Zhang, X. Liu, X. Zhao, Y. Hu, Z. Yang, C. Yang, Z. Yuan and Y. Chen, *ACS Appl. Mater. Interfaces*, 2021, **13**, 29876-29884.
9. X. Yuan, H. Chen, S. Kim, Y. Chen, Y. Zhang, M. Yang, Z. Chen, C. Yang, H. Wu, X. Gao, Z. Liu and C. Duan, *Adv. Energy Mater.*, 2023, **13**, 2204394.
10. Z. Abbas, S. U. Ryu, M. Haris, C. E. Song, H. K. Lee, S. K. Lee, W. S. Shin, T. Park and J.-C. Lee, *Nano Energy*, 2022, **101**, 107574.

11. L. Hong, H. Yao, Z. Wu, Y. Cui, T. Zhang, Y. Xu, R. Yu, Q. Liao, B. Gao, K. Xian, H. Y. Woo, Z. Ge and J. Hou, *Adv. Mater.*, 2019, **31**, 1903441.
